# Supplementary material
Source: MDPI journal article supplement (https://www.mdpi.com/2077-0472/12/2/215)
Supplement: s1 [file s1]

Table S1. The apparent CO<sub>2</sub> photocompensation point ( $C_i^*$ ) and the day respiration rate ( $R_d$ ) in the flag leaves of the tested rice genotypes under different nitrogen supplies.

| Genotype     | Treatment | $C_i^*$ ( $\mu\text{mol mol}^{-1}$ ) | $R_d$ ( $\mu\text{mol m}^{-2} \text{s}^{-1}$ ) |
|--------------|-----------|--------------------------------------|------------------------------------------------|
| Sab Ini      | HN        | $43.9 \pm 3.2$                       | $0.43 \pm 0.38$                                |
|              | LN        | $43.2 \pm 1.4$                       | $0.45 \pm 0.02$                                |
| N22          | HN        | $52.1 \pm 2.4$                       | $0.90 \pm 0.22$                                |
|              | LN        | $47.3 \pm 3.5$                       | $0.71 \pm 0.18$                                |
| Huanghuazhan | HN        | $42.2 \pm 1.6$                       | $0.33 \pm 0.10$                                |
|              | LN        | $42.3 \pm 0.6$                       | $0.41 \pm 0.18$                                |
| Yongyou 12   | HN        | $44.5 \pm 4.1$                       | $0.64 \pm 0.55$                                |
|              | LN        | 43.3                                 | 0.84                                           |
| ANOVA        |           |                                      |                                                |
| Genotype     |           | **                                   | ns                                             |
| N treatment  |           | ns                                   | ns                                             |
| Genotype*N   |           | ns                                   | ns                                             |
| treatment    |           |                                      |                                                |

Parameters were compared between treatments based on the least significant difference (LSD) test at the 0.05 probability level. \*\*,  $p < 0.01$ ; ns, non-significant.

Table S2. Effects of nitrogen supplies on leaf nitrogen contents, gas exchange parameters and photosynthetic nitrogen use efficiency in the flag leaves of the tested rice genotypes.

| Genotype     | Treatment | $N_{\text{mass}}$<br>( $\text{mg g}^{-1}$ ) | $N_{\text{area}}$<br>( $\text{g m}^{-2}$ ) | $A$ ( $\mu\text{mol m}^{-2} \text{s}^{-1}$ ) | $g_s$ ( $\text{mol m}^{-2} \text{s}^{-1}$ ) | $g_m$ ( $\text{mol m}^{-2} \text{s}^{-1}$ ) | PNUE ( $\mu\text{mol g}^{-1} \text{(N) s}^{-1}$ ) |
|--------------|-----------|---------------------------------------------|--------------------------------------------|----------------------------------------------|---------------------------------------------|---------------------------------------------|---------------------------------------------------|
| Sab Ini      | HN        | $2.5 \pm 0.2$                               | $0.83 \pm 0.05$                            | $26.2 \pm 0.9$                               | $0.262 \pm 0.014$                           | $0.191 \pm 0.006$                           | $31.7 \pm 1.1$                                    |
|              | LN        | $2.0 \pm 0.1$                               | $0.58 \pm 0.03$                            | $18.3 \pm 4.2$                               | $0.199 \pm 0.073$                           | $0.149 \pm 0.040$                           | $31.5 \pm 7.0$                                    |
| N22          | HN        | $2.4 \pm 0.1$                               | $1.03 \pm 0.03$                            | $20.2 \pm 1.1$                               | $0.184 \pm 0.010$                           | $0.269 \pm 0.065$                           | $19.5 \pm 1.6$                                    |
|              | LN        | $1.8 \pm 0.0$                               | $0.79 \pm 0.03$                            | $14.7 \pm 1.1$                               | $0.157 \pm 0.024$                           | $0.185 \pm 0.044$                           | $18.7 \pm 1.4$                                    |
| Huanghuazhan | HN        | $2.4 \pm 0.1$                               | $1.03 \pm 0.02$                            | $26.5 \pm 0.3$                               | $0.347 \pm 0.181$                           | $0.285 \pm 0.164$                           | $25.8 \pm 0.6$                                    |
|              | LN        | $1.8 \pm 0.2$                               | $0.97 \pm 0.04$                            | $23.0 \pm 3.3$                               | $0.327 \pm 0.225$                           | $0.155 \pm 0.041$                           | $23.9 \pm 3.5$                                    |
| Yongyou 12   | HN        | $2.2 \pm 0.1$                               | $1.08 \pm 0.08$                            | $18.0 \pm 1.1$                               | $0.142 \pm 0.027$                           | $0.225 \pm 0.001$                           | $16.6 \pm 1.4$                                    |
|              | LN        | $1.5 \pm 0.1$                               | $0.79 \pm 0.02$                            | $13.6 \pm 1.1$                               | $0.135 \pm 0.024$                           | $0.250 \pm 0.094$                           | $17.3 \pm 1.4$                                    |
| ANOVA        |           |                                             |                                            |                                              |                                             |                                             |                                                   |
| Genotype     |           | ***                                         | ***                                        | ***                                          | *                                           | ns                                          | ***                                               |
| N treatment  |           | ***                                         | ***                                        | ***                                          | ns                                          | ns                                          | ns                                                |
| Genotype*N   |           | ns                                          | **                                         | ns                                           | ns                                          | ns                                          | ns                                                |
| treatment    |           |                                             |                                            |                                              |                                             |                                             |                                                   |

Parameters were compared between treatments based on the least significant difference (LSD) test at the 0.05 probability level. \*,  $p < 0.05$ ; \*\*,  $p < 0.01$ ; \*\*\*,  $p < 0.001$ ; ns, non-significant.

Table S3. Effects of nitrogen supplies on leaf anatomical traits in the flag leaves of the tested rice genotypes.

| Genotype     | Treatment | LMA (g m <sup>-2</sup> ) | LT (mm)       | LD (mg mm <sup>-3</sup> ) | <i>T</i> <sub>cw</sub> (nm) |
|--------------|-----------|--------------------------|---------------|---------------------------|-----------------------------|
| Sab Ini      | HN        | 33.2 ± 1.9               | 0.120 ± 0.004 | 0.278 ± 0.016             | 288 ± 15                    |
|              | LN        | 29.4 ± 2.8               | 0.140 ± 0.004 | 0.210 ± 0.016             | 288 ± 28                    |
| N22          | HN        | 42.7 ± 0.4               | 0.126 ± 0.006 | 0.339 ± 0.016             | 255 ± 22                    |
|              | LN        | 44.0 ± 1.6               | 0.111 ± 0.003 | 0.395 ± 0.016             | 253 ± 20                    |
| Huanghuazhan | HN        | 43.1 ± 2.5               | 0.126 ± 0.006 | 0.341 ± 0.016             | 269 ± 36                    |
|              | LN        | 52.9 ± 6.1               | 0.145 ± 0.006 | 0.365 ± 0.016             | 266 ± 33                    |
| Yongyou 12   | HN        | 49.1 ± 1.5               | 0.176 ± 0.020 | 0.279 ± 0.016             | 319 ± 24                    |
|              | LN        | 52.9 ± 2.9               | 0.162 ± 0.010 | 0.328 ± 0.016             | 306 ± 41                    |
| ANOVA        |           |                          |               |                           |                             |
| Genotype     |           | ***                      | ***           | ***                       | ***                         |
| N treatment  |           | *                        | ns            | ns                        | ns                          |
| Genotype*N   |           | **                       | **            | ***                       | ns                          |
| treatment    |           |                          |               |                           |                             |

Parameters were compared between treatments based on the least significant difference (LSD) test at the 0.05 probability level. \*,  $p < 0.05$ ; \*\*,  $p < 0.01$ ; \*\*\*,  $p < 0.001$ ; ns, non-significant.

Table S4. Effects of nitrogen supplies on mass-based leaf chemical compositions in the flag leaves of the tested rice genotypes.

| Genotype             | Treatment | Pectic<br>substance (mg<br>g <sup>-1</sup> ) | Hemicellulose<br>(mg g <sup>-1</sup> ) | Cellulose<br>(mg g <sup>-1</sup> ) | Lignin<br>(mg g <sup>-1</sup> ) | Cell wall<br>content<br>(mg g <sup>-1</sup> ) | Soluble sugar<br>(mg g <sup>-1</sup> ) | Starch (mg<br>g <sup>-1</sup> ) | NSC<br>(mg g <sup>-1</sup> ) |
|----------------------|-----------|----------------------------------------------|----------------------------------------|------------------------------------|---------------------------------|-----------------------------------------------|----------------------------------------|---------------------------------|------------------------------|
| Sab Ini              | HN        | 19.4 ± 2.7                                   | 213.7 ± 7.1                            | 229.5 ± 21.8                       | 158.9 ± 2.9                     | 625.3 ± 18.3                                  | 142.7 ± 7.1                            | 26.4 ± 6.8                      | 169.1 ± 9.3                  |
|                      | LN        | 17.8 ± 2.4                                   | 222.2 ± 7.4                            | 171.3 ± 80.3                       | 149.4 ± 7.1                     | 560.8 ± 88.4                                  | 112.8 ± 11.4                           | 13.5 ± 8.0                      | 126.3 ± 19.3                 |
| N22                  | HN        | 15.4 ± 1.0                                   | 222.1 ± 16.4                           | 179.3 ± 35.5                       | 167.9 ± 5.4                     | 584.7 ± 22.2                                  | 96.8 ± 5.9                             | 9.3 ± 1.3                       | 106.1 ± 5.2                  |
|                      | LN        | 16.9 ± 1.7                                   | 243.6 ± 15.9                           | 205.1 ± 33.5                       | 144.6 ± 27.3                    | 610.3 ± 31.5                                  | 88.2 ± 7.9                             | 5.4 ± 2.9                       | 93.6 ± 7.3                   |
| Huanghuazhan         | HN        | 18.3 ± 1.5                                   | 236.1 ± 8.5                            | 268.2 ± 5.6                        | 175.7 ± 6.2                     | 698.3 ± 4.2                                   | 89.0 ± 6.9                             | 3.7 ± 1.4                       | 92.7 ± 8.1                   |
|                      | LN        | 17.8 ± 0.8                                   | 252.5 ± 13.6                           | 231.9 ± 64.2                       | 168.4 ± 4.0                     | 670.6 ± 68.1                                  | 81.5 ± 16.8                            | 5.7 ± 2.8                       | 87.3 ± 17.5                  |
| Yongyou 12           | HN        | 19.7 ± 1.6                                   | 266.3 ± 3.0                            | 207.4 ± 72.0                       | 176.9 ± 5.0                     | 670.4 ± 71.6                                  | 57.9 ± 10.2                            | 3.3 ± 4.0                       | 60.1 ± 12.7                  |
|                      | LN        | 17.1 ± 0.7                                   | 271.2 ± 16.3                           | 301.1 ± 7.3                        | 164.8 ± 7.3                     | 754.1 ± 18.4                                  | 66.0 ± 9.2                             | 14.1 ± 3.0                      | 80.1 ± 12.2                  |
| ANOVA                |           |                                              |                                        |                                    |                                 |                                               |                                        |                                 |                              |
| Genotype             |           | ns                                           | ***                                    | ns                                 | *                               | **                                            | ***                                    | ***                             | ***                          |
| N treatment          |           | ns                                           | *                                      | ns                                 | *                               | ns                                            | *                                      | ns                              | ns                           |
| Genotype*N treatment |           | ns                                           | ns                                     | ns                                 | ns                              | ns                                            | *                                      | ns                              | **                           |

Parameters were compared between treatments based on the least significant difference (LSD) test at the 0.05 probability level. \*,  $p < 0.05$ ; \*\*,  $p < 0.01$ ; \*\*\*,  $p < 0.001$ ; ns, non-significant.

Table S5. Effects of nitrogen supplies on area-based leaf chemical compositions in the flag leaves of the tested rice genotypes.

| Genotype             | Treatment | Pectic substance (g m <sup>-2</sup> ) | Hemicellulose (g m <sup>-2</sup> ) | Cellulose (g m <sup>-2</sup> ) | Lignin (g m <sup>-2</sup> ) | Cell wall content (g m <sup>-2</sup> ) | Soluble sugar (g m <sup>-2</sup> ) | Starch (g m <sup>-2</sup> ) | NSC (g m <sup>-2</sup> ) |
|----------------------|-----------|---------------------------------------|------------------------------------|--------------------------------|-----------------------------|----------------------------------------|------------------------------------|-----------------------------|--------------------------|
| Sab Ini              | HN        | 0.64 ± 0.09                           | 7.1 ± 0.2                          | 7.6 ± 0.7                      | 5.3 ± 0.1                   | 20.8 ± 0.6                             | 4.74 ± 0.23                        | 0.88 ± 0.23                 | 5.62 ± 0.31              |
|                      | LN        | 0.52 ± 0.07                           | 6.5 ± 0.2                          | 5.0 ± 2.4                      | 4.4 ± 0.2                   | 16.5 ± 2.6                             | 3.76 ± 0.50                        | 0.42 ± 0.20                 | 4.18 ± 0.36              |
| N22                  | HN        | 0.66 ± 0.04                           | 9.5 ± 0.7                          | 7.7 ± 1.5                      | 7.2 ± 0.2                   | 25.0 ± 0.9                             | 4.17 ± 0.25                        | 0.40 ± 0.06                 | 4.58 ± 0.23              |
|                      | LN        | 0.74 ± 0.07                           | 10.7 ± 0.7                         | 9.0 ± 1.5                      | 6.4 ± 1.2                   | 26.8 ± 1.4                             | 3.85 ± 0.31                        | 0.23 ± 0.13                 | 4.09 ± 0.27              |
| Huanghuazhan         | HN        | 0.79 ± 0.06                           | 10.2 ± 0.4                         | 11.6 ± 0.2                     | 7.6 ± 0.3                   | 30.1 ± 0.2                             | 4.11 ± 0.33                        | 0.17 ± 0.05                 | 4.27 ± 0.31              |
|                      | LN        | 0.94 ± 0.04                           | 13.4 ± 0.7                         | 12.3 ± 3.4                     | 8.9 ± 0.2                   | 35.5 ± 3.6                             | 4.23 ± 1.02                        | 0.30 ± 0.14                 | 4.53 ± 1.06              |
| Yongyou 12           | HN        | 0.97 ± 0.08                           | 13.1 ± 0.1                         | 10.2 ± 3.5                     | 8.7 ± 0.2                   | 32.9 ± 3.5                             | 2.93 ± 0.61                        | 0.17 ± 0.21                 | 3.04 ± 0.76              |
|                      | LN        | 0.90 ± 0.04                           | 14.3 ± 0.9                         | 15.9 ± 0.4                     | 8.7 ± 0.4                   | 39.9 ± 1.0                             | 3.49 ± 0.48                        | 0.75 ± 0.16                 | 4.24 ± 0.64              |
| ANOVA                |           |                                       |                                    |                                |                             |                                        |                                    |                             |                          |
| Genotype             |           | ***                                   | ***                                | ***                            | ***                         | ***                                    | ***                                | **                          | **                       |
| N treatment          |           | ns                                    | ***                                | ns                             | ns                          | *                                      | ns                                 | ns                          | ns                       |
| Genotype*N treatment |           | **                                    | ***                                | *                              | **                          | **                                     | ***                                | *                           | ***                      |

Parameters were compared between treatments based on the least significant difference (LSD) test at the 0.05 probability level. \*,  $p < 0.05$ ; \*\*,  $p < 0.01$ ; \*\*\*,  $p < 0.001$ ; ns, non-significant.
